# Supplementary material
Source: publisher figshare collection journal article supplement (https://sage.figshare.com/ndownloader/files/23742601)
Supplement: Supplementary file 1 [file 23742601]

## Appendix A

### An Instance of Traces in Trace Interface

```

File Edit Format View Help
Form Open Time: 01:28
Main window-Automatic Pre-reading Arrangement of Activities Button Clicked-Time: 01:29
----- New Form Opened -----
Form Name: Manual arrangement of pre-reading activities
Form Open Time: 01:29
Main window-My Notebook Button Clicked-Time: 01:30
----- New Form Opened -----
Form Name: My Notebook
Form Open Time: 01:30
----- My Notebook Closed ----- Duration: 00:00:03
----- Manual arrangement of pre-reading activities Closed ----- Duration: 00:00:31
Main window-Play Music Button Clicked-Time: 01:30
Main window-Pause Music Button Clicked-Time: 01:30
----- New Form Opened -----
Form Name: Post-Reading Questions
Form Open Time: 01:30
----- Post-Reading Questions Closed ----- Duration: 00:00:07
----- New Form Opened -----
Form Name: Reading
Form Open Time: 01:30
Reading-Reading Paragraph-1 Button Clicked-Time: 01:30
----- Reading Closed ----- Duration: 00:00:00
----- New Form Opened -----
Form Name: Pre-Reading Questions
Form Open Time: 01:30
Pre-Reading Questions-Next Question Button Clicked-Time: 01:30
----- Pre-Reading Questions Closed ----- Duration: 00:00:02
----- New Form Opened -----
Form Name: Manual arrangement of pre-reading activities
Form Open Time: 01:30
----- Manual arrangement of pre-reading activities Closed ----- Duration: 00:00:09
----- New Form Opened -----
Form Name: Reading
Form Open Time: 01:30
Reading-Reading Paragraph-1 Button Clicked-Time: 01:30
----- Reading Closed ----- Duration: 00:00:42
----- Main window Closed ----- Duration: 00:03:16
"/%-%/%-%/% USER LOGGED IN %-%/%-%/%-%/%-%/
Log in time: 05/01/2019 01:32:02
----- New Form Opened -----
Form Name: Main window
Form Open Time: 01:32
----- New Form Opened -----
Form Name: Manual arrangement of pre-reading activities
Form Open Time: 01:32
----- Manual arrangement of pre-reading activities Closed ----- Duration: 00:00:29
Main window-My Notebook Button Clicked-Time: 01:33
----- New Form Opened -----
Form Name: My Notebook
Form Open Time: 01:33

```

## Appendix B Scoring Checklist

Participant ID: .....  
 Number of Tallies for Centering MSs: .....  
 Number of Tallies for Planning MSs: .....  
 Number of Tallies for Evaluation MSs: .....  
 Total Number of Tallies: .....  
 Scorer ID: .....

| RMSAU      | Tally Mark for Each Time Strategy observed in the trace interface | Cue Elements                                                   |
|------------|-------------------------------------------------------------------|----------------------------------------------------------------|
| Centering  |                                                                   | click the title                                                |
|            |                                                                   | click the question and instruction                             |
|            |                                                                   | in the dialogue box they can optionally predict the content    |
|            |                                                                   | click the whole text to see it in 15 seconds                   |
|            |                                                                   | Either listen to music while reading or just read              |
|            |                                                                   | Highlight or underline while reading                           |
|            |                                                                   | Discuss the week points                                        |
| Planning   |                                                                   | Discuss the reading problems                                   |
|            |                                                                   | Ask questions                                                  |
|            |                                                                   | Discuss effective strategies                                   |
|            |                                                                   | Take notes                                                     |
|            |                                                                   | Click quick glance at text                                     |
|            |                                                                   | Click quick look at directions                                 |
|            |                                                                   | Use notebook within the system                                 |
|            |                                                                   | Check the time                                                 |
|            |                                                                   | Automatic versus manual arrangement                            |
|            |                                                                   | Talks about the general content of the passage in advance      |
|            |                                                                   | Use dictionary within the system                               |
|            |                                                                   | Introduces novel texts                                         |
|            |                                                                   | Introduces stories                                             |
| Evaluating |                                                                   | Takes notes and discusses difficulties                         |
|            |                                                                   | Traces left for every referring back to check mistakes         |
|            |                                                                   | Use notebook within the system                                 |
|            |                                                                   | Discussion with classmates for the difficult points            |
|            |                                                                   | Use characteristics of good readers by introducing it to peers |
|            |                                                                   | Gives ideas about reading performance                          |

### Appendix C

#### RMSA Questionnaire

| Type                    | Reading metacognitive Strategies                                                                                                                                                                                                                                                                                                                                                                                                                                                                                                                                                                                                                                                                                                                                                                                                                                                                                                                                                          | Rating scale |   |   |   |   |
|-------------------------|-------------------------------------------------------------------------------------------------------------------------------------------------------------------------------------------------------------------------------------------------------------------------------------------------------------------------------------------------------------------------------------------------------------------------------------------------------------------------------------------------------------------------------------------------------------------------------------------------------------------------------------------------------------------------------------------------------------------------------------------------------------------------------------------------------------------------------------------------------------------------------------------------------------------------------------------------------------------------------------------|--------------|---|---|---|---|
|                         |                                                                                                                                                                                                                                                                                                                                                                                                                                                                                                                                                                                                                                                                                                                                                                                                                                                                                                                                                                                           | 1            | 2 | 3 | 4 | 5 |
| Centering your learning | <ol style="list-style-type: none"> <li>1. I preview the text title and general structure of the text before reading it.</li> <li>2. I preview the question and instruction to understand what to do.</li> <li>3. I usually predict the content of the text from the title.</li> <li>4. I look quickly through the text to get the main idea or gist.</li> <li>5. I usually decide in advance to pay attention to task not other issues.</li> <li>6. I determine the major points I would pay attention to such as headings and sub-headings, the topic sentence and the text structure.</li> <li>7. I recall my weak points in reading comprehension and try to comprehend when reading begins.</li> <li>8. I pay selective attention to the information predicted and required in the task.</li> </ol>                                                                                                                                                                                   |              |   |   |   |   |
| Planning                | <ol style="list-style-type: none"> <li>9. I talk about my reading problems and try to solve them by the aid of teachers or peers.</li> <li>10. I'm not afraid of asking questions.</li> <li>11. I share ideas with other classmates about effective strategies we have tried.</li> <li>12. I could come up with a list of reading strategies I would probably use.</li> <li>13. I scan the text first and concentrate on what I will read.</li> <li>14. I read the task before I read the text.</li> <li>15. I keep a notebook to write important points on it.</li> <li>16. I allocate some relaxation time to have well-concentration.</li> <li>17. I plan before I read because I think it is helpful.</li> <li>18. I try to guess the whole text.</li> <li>19. Whenever needed I use dictionary to find the meaning of unknown words.</li> <li>20. Whenever possible I practice reading English texts.</li> <li>21. During free times, I usually read English novels.</li> </ol>      |              |   |   |   |   |
| Evaluating              | <ol style="list-style-type: none"> <li>22. I write down my significant difficulties in reading comprehension on a note book and try to eliminate them.</li> <li>23. I check my own mistakes and errors and try to find solutions for them</li> <li>24. It is a good idea to use checklists to monitor my errors.</li> <li>25. I realized that my major concern is coming with the better understanding by accomplishing the task.</li> <li>26. I enjoyed discussing with my class-mates for the difficult points and exchanging the reading experience to get a more effective reading method to achieve my goal.</li> <li>27. I used my own reading plan for judging how well I read.</li> <li>28. I could be able to use the characteristics of a good reader as criteria to evaluate my own reading.</li> <li>29. I spent time to motivate myself to improve the reading even I found that I do a poor job.</li> <li>30. I spent time reflecting on my reading performance.</li> </ol> |              |   |   |   |   |
